# Supplementary material for: Metal cation responsive anionic microgels: behaviour towards biologically relevant divalent and trivalent ions
Source: Royal Society of Chemistry journal article supplement (doi:10.1039/d0sm01458c), 2020-10-16
Supplement: d0sm01458c1.pdf [file d0sm01458c1.pdf]

# Metal Cation Responsive Anionic Microgels: Behaviour Towards Biologically Relevant Divalent and Trivalent Ions

Vittoria Chimisso, Simona Conti, Phally Kong, Csaba Fodor and Wolfgang P. Meier\*

University of Basel, Department of Chemistry, Mattenstrasse 24/a, 4002 Basel

## Nuclear Magnetic resonance (NMR)

<sup>1</sup>H NMR were recorded in deuterated solvents (CDCl<sub>3</sub> or D<sub>2</sub>O) on a Bruker 400 MHz spectrometer at room temperature, utilizing 256 scans with a 0.1 wt% microgel concentration. The chemical shifts ( $\delta$ ) are reported in ppm and are calibrated to the residual peaks of the main solvent. The collected spectra were analysed using MestReNova (v 9.1) (Mestrelab Research S.L.).

**Table S1. Synthetic conditions for the polymerization of neutral microgels with various *N*-vinylcaprolactam (VCL) and dimethylitaconate (IADME) ratios.**

| Sample ID | VCL/IADME ratio | VCL   |       | IADME |      | AMPA  |      | BIS   |      | CTAB  |       |
|-----------|-----------------|-------|-------|-------|------|-------|------|-------|------|-------|-------|
|           |                 | g     | mmol  | g     | mmol | g     | mmol | g     | mmol | g     | mmol  |
| N0        | 100:0           | 2.087 | 15.00 | -     | -    | 0.053 | 0.19 | 0.060 | 0.38 | 0.010 | 0.027 |
| N1        | 95:5            | 1.983 | 14.24 | 0.118 | 0.75 | 0.053 | 0.19 | 0.060 | 0.38 | 0.010 | 0.027 |
| N2        | 90:10           | 7.879 | 13.50 | 0.237 | 1.50 | 0.053 | 0.19 | 0.060 | 0.38 | 0.010 | 0.027 |
| N3        | 80:20           | 1.670 | 12.00 | 0.474 | 3.0  | 0.053 | 0.19 | 0.060 | 0.38 | 0.010 | 0.027 |

**Table S2. Amount of dimethylitaconate (IADME) incorporated and itaconic acid (IA) groups.**

| Sample ID | IADME mol%        |           |                |           | Sample | TITRATION COOH<br>mol% |
|-----------|-------------------|-----------|----------------|-----------|--------|------------------------|
|           | Theoretical value | NMR value | ATR-FTIR value |           |        |                        |
| <b>N1</b> | 5                 | 5         | 5.775          | <b>M1</b> | 5.8    |                        |
| <b>N2</b> | 10                | 10        | 9.395          | <b>M2</b> | 10     |                        |
| <b>N3</b> | 20                | 20        | 22.950         | <b>M3</b> | 19     |                        |

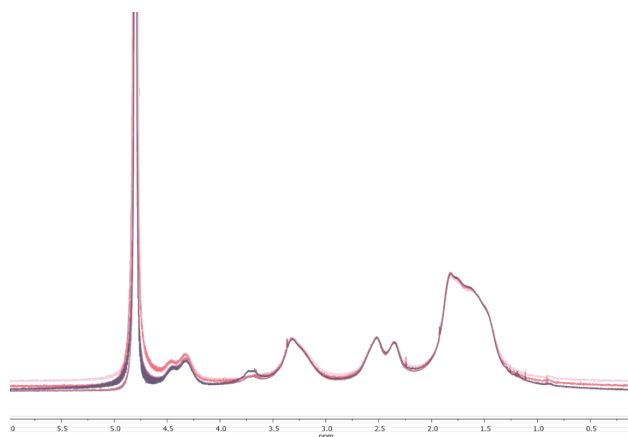

Figure S1.  $^1\text{H}$  NMR spectrum of **M<sub>n</sub>** microgels recorded in  $\text{CDCl}_3$ . **M1** (*light pink*), **M2** (*pink*) and **M3** (*purple*).

**Table S3.  $R_g/R_H$  ratio of M1, M2 and M3 taken at 20°C, at pH 7, 1 mM  $\text{Mg}^{2+}$  and pH=2.**

| Microgel  | pH 7 | 1 mM $[\text{M}^{2+}]$ | pH 3 |
|-----------|------|------------------------|------|
| <b>M1</b> | 0.44 | 0.59                   | 0.56 |
| <b>M2</b> | 0.49 | 0.64                   | 0.64 |
| <b>M3</b> | 0.45 | 0.66                   | 0.65 |

**Table S4.  $D_H$  of homopolymeric VCL microgel N0 in pure water and in the presence of 1mM  $M^{2+/3+}$  ions at 10 °C and neutral pH.**

| Sample | H <sub>2</sub> O | Mg <sup>2+</sup> | Sr <sup>+2</sup> | Cu <sup>(II)</sup> | Fe <sup>(III)</sup> |
|--------|------------------|------------------|------------------|--------------------|---------------------|
| N0     | 375 ± 19         | 355 ± 20         | 355 ± 22         | 360 ± 27           | 340 ± 35            |

**Table S5. Amount of Mg<sup>2+</sup> ion bonded at ambient condition in PBS**

| Microgel | % Mg <sup>2+</sup> | % Fe <sup>3+</sup> |
|----------|--------------------|--------------------|
| M1       | 0                  | 100                |
| M3       | 0                  | 100                |

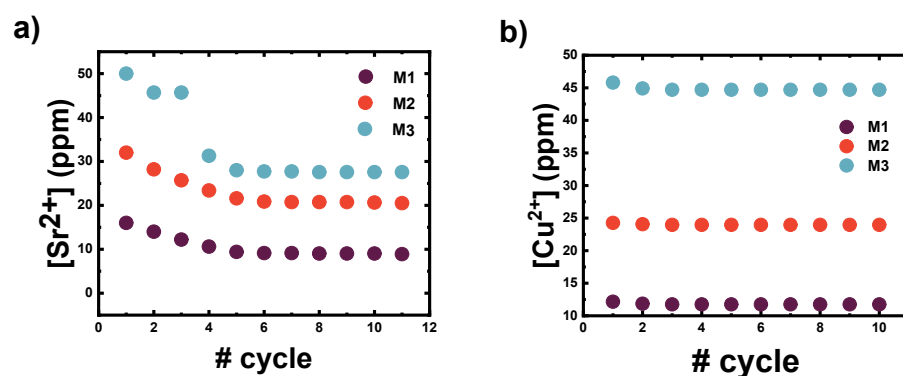

Figure S2. Amount in ppm of (a) Sr<sup>2+</sup> and (b) Cu<sup>2+</sup> retained by a 0.1 wt% microgel solution at room temperature and neutral pH. Microgels used are M1 (5.8 mol% COOH), M2 (10 mol% COOH) and M3 (18 mol% COOH).
